# Supplementary material
Source: publisher figshare collection journal article supplement (https://frontiersin.figshare.com/ndownloader/files/22330230)
Supplement: Supplementary file [file 22330230]

## Supplementary Material

### Supplementary file 3: Patient Characteristics

| Characteristics (Cohort 1)         | Gliomas WHO grade II-IV (n=158) |
|------------------------------------|---------------------------------|
| Age, years median (range)          | 60 (23-89)                      |
| Gender, n (%)                      |                                 |
| Male                               | 94 (59.5)                       |
| Female                             | 64 (40.5)                       |
| Diagnosis, n (%)                   | n=158                           |
| Oligodendroglioma WHO grade II-III | 7 (4.4%)                        |
| Astrocytoma WHO grade II-III       | 17 (10.8%)                      |
| GBM                                | 134 (84.8%)                     |
| Survival outcome                   | n=156                           |
| OS, weeks median (range)           | 58 (1-233)                      |
| Lost to follow-up                  | 2                               |
| Plasma YKL-40 ng/ml median (range) | 62 (10-1035)                    |
| Plasma IL-6 pg/ml median (range)   | 1 (0.3-26.5)                    |
| CHI3L1 SNP rs4950928, n (%)        | n=151                           |
| C/C                                | 91 (60.3)                       |
| G/C                                | 57 (37.7)                       |
| G/G                                | 3 (2.0)                         |
| Missing                            | 7                               |
| Status at end of follow-up, n (%)  | n=156                           |
| Dead                               | 116 (74.4)                      |
| Alive                              | 40 (25.6)                       |
| Lost to follow-up                  | 2                               |

| Characteristics (Cohort 2)                 | Newly diagnosed GBM (n=94) |
|--------------------------------------------|----------------------------|
| Age, years median (range)                  | 65 (33-89)                 |
| Gender, n (%)                              |                            |
| Male                                       | 57 (60.6)                  |
| Female                                     | 37 (39.4)                  |
| Modified Charlson Comorbidity Index, n (%) | n=89                       |
| 0                                          | 62 (69.7)                  |
| 1                                          | 19 (21.3)                  |
| 2                                          | 4 (4.5)                    |
| 3                                          | 2 (2.2)                    |
| 4                                          | 0                          |
| 5                                          | 0                          |
| 6                                          | 2 (2.2)                    |
| Missing                                    | 5                          |
| Multifocal disease, n (%)                  | n=85                       |
| Yes                                        | 6 (7.1)                    |
| No                                         | 79 (92.9)                  |

|                                                    |                       |
|----------------------------------------------------|-----------------------|
| Missing                                            | 9                     |
| <b>Degree of resection, n (%)</b>                  | <b>n=87</b>           |
| Partial resection                                  | 41 (47.1)             |
| Gross-total resection                              | 46 (52.9)             |
| Missing                                            | 7                     |
| <b>Treatment, n (%)</b>                            | <b>n=94</b>           |
| No treatment                                       | 7 (7.4)               |
| Radiation therapy only                             | 3 (3.2)               |
| Temozolomide (TMZ) only                            | 2 (2.1)               |
| Stupps Regimen                                     | 65 (69.1)             |
| Radiation therapy and concomittant TMZ             | 2 (2.1)               |
| Palliative radiation therapy                       | 15 (16)               |
| Missing                                            | 0                     |
| <b>Steroid treatment at blood-sampling, n (%)</b>  | <b>n=82</b>           |
| 0                                                  | 2 (2.4)               |
| 12.5-25 mg                                         | 3 (3.7)               |
| 50-75 mg                                           | 28 (34.1)             |
| 87.5-100 mg                                        | 46 (56.1)             |
| >100 mg                                            | 3 (3.7)               |
| Missing                                            | 12                    |
| <b>MGMT promotor methylation status, n (%)</b>     | <b>n=91</b>           |
| Methylated                                         | 40 (44)               |
| Non-methylated                                     | 51 (56)               |
| Missing                                            | 3                     |
| <b>Recurrence, n (%)</b>                           | <b>n=93</b>           |
| Yes                                                | 74 (77.7)             |
| Dead without verified recurrence                   | 13                    |
| Alive at end of follow-up without recurrence       | 6                     |
| Missing (Uncertainty regarding recurrence date)    | 1                     |
| <b>Survival outcome</b>                            |                       |
| PFS, weeks median (range)                          | 23 (3-233)            |
| Missing (Uncertainty regarding recurrence date), n | 1                     |
| OS, weeks median (range)                           | 58 (3-233)            |
| Lost to follow-up, n                               | 2                     |
| <b>Plasma YKL-40 ng/ml median (range)</b>          | <b>77.5 (10-1035)</b> |
| <b>Plasma IL-6 pg/ml median (range)</b>            | <b>1.1 (0.3-26.5)</b> |
| <b>CHI3L1 SNP rs4950928, n (%)</b>                 | <b>n=90</b>           |
| C/C                                                | 59 (65.6)             |
| G/C                                                | 29 (32.2)             |
| G/G                                                | 2 (2.2)               |
| Missing                                            | 4                     |

|                                   |                             |
|-----------------------------------|-----------------------------|
| <b>Characteristics (Cohort 3)</b> | <b>Recurrent GBM (n=40)</b> |
| <b>Age, years median (range)</b>  | <b>56 (37-79)</b>           |
| <b>Gender, n (%)</b>              |                             |

|                                                                             |                      |
|-----------------------------------------------------------------------------|----------------------|
| Male                                                                        | 22 (55)              |
| Female                                                                      | 18 (45)              |
| <b>Modified Charlson Comorbidity Index, n (%)</b>                           | <b>n=39</b>          |
| 0                                                                           | 31 (79.5)            |
| 1                                                                           | 3 (7.7)              |
| 2                                                                           | 4 (10.3)             |
| 3                                                                           | 1 (2.6)              |
| Missing                                                                     | 1                    |
| <b>Multifocal disease, n (%)</b>                                            | <b>n=38</b>          |
| Yes                                                                         | 4 (10.5)             |
| No                                                                          | 34 (89.5)            |
| Missing                                                                     | 2                    |
| <b>Primary treatment regimen, n= 38 (%)</b>                                 | <b>n=38</b>          |
| No treatment                                                                | 1 (2.6)              |
| Radiation therapy only                                                      | 0                    |
| Temozolomide (TMZ) only                                                     | 0                    |
| Stupps Regimen                                                              | 35 (92.1)            |
| Radiation therapy and concomittant TMZ                                      | 0                    |
| Palliative radiation therapy                                                | 2 (5.3)              |
| Missing                                                                     | 2                    |
| <b>Number of recurrences, n (%)</b>                                         | <b>n=39</b>          |
| First recurrence GBM                                                        | 25 (64.1)            |
| Second recurrence GBM                                                       | 12 (30.8)            |
| Third recurrence GBM                                                        | 2 (5.1)              |
| Missing                                                                     | 1                    |
| <b>Treatment, n (%)</b>                                                     | <b>n=38</b>          |
| No treatment                                                                | 18 (47.4)            |
| Radiation therapy only                                                      | 1 (2.6)              |
| Temozolomide only                                                           | 6 (15.8)             |
| Lomustine only                                                              | 1 (2.6)              |
| Avastin and Lomustine                                                       | 5 (13.2)             |
| Clinical trial                                                              | 5 (13.2)             |
| Radiation therapy and Temozolomide                                          | 2 (5.2)              |
| Missing                                                                     | 2                    |
| <b>Survival outcome</b>                                                     |                      |
| OS (from blood sampling to death or end of follow-up), weeks median (range) | 33 (2-102)           |
| OS (from diagnosis to death or end of follow-up), weeks median (range)      | 97 (30-785)          |
| <b>Plasma YKL-40 ng/ml, median (range)</b>                                  | <b>60.5 (17-266)</b> |
| <b>Plasma IL-6 pg/ml, median (range)</b>                                    | <b>1.1 (0.3-4.4)</b> |
| <b>CHI3L1 SNP rs4950928, n (%)</b>                                          | <b>n=37</b>          |
| C/C                                                                         | 20 (54.1)            |
| G/C                                                                         | 17 (45.9)            |
| G/G                                                                         | 0                    |
| Missing                                                                     | 3                    |
